# Supplementary material for: Highly efficient decomposition of ammonia using high-entropy alloy catalysts
Source: PubMed Central journal article supplement (PMC6728353; doi:10.1038/s41467-019-11848-9), 2019-09-05
Supplement: 41467_2019_11848_MOESM1_ESM.pdf [file 41467_2019_11848_MOESM1_ESM.pdf]

## Highly Efficient Decomposition of Ammonia Using High-Entropy Alloy Catalysts

Pengfei Xie,<sup>1,†</sup> Yonggang Yao,<sup>2,†</sup> Zhennan Huang,<sup>3,†</sup> Zhenyu Liu,<sup>4,†</sup> Junlei Zhang,<sup>1</sup>  
Tangyuan Li,<sup>2</sup> Guofeng Wang,<sup>4,\*</sup> Reza Shahbazian-Yassar,<sup>3,\*</sup> Liangbing Hu,<sup>2,\*</sup> Chao  
Wang<sup>1,\*</sup>

<sup>1</sup> Department of Chemical and Biomolecular Engineering, Johns Hopkins University, Baltimore, Maryland, 21218, USA;

<sup>2</sup> Department of Materials Science and Engineering, University of Maryland, College Park, Maryland, 20742, USA;

<sup>3</sup> Department of Mechanical and Industrial Engineering, University of Illinois, Chicago, Illinois 60607, USA;

<sup>4</sup> Department of Mechanical Engineering & Materials Science, University of Pittsburgh, Pittsburgh, Pennsylvania, 15261, USA.

† These authors contributed equally to this work.

\* Emails: [chaowang@jhu.edu](mailto:chaowang@jhu.edu); [binghu@umd.edu](mailto:binghu@umd.edu); [rsyassar@uic.edu](mailto:rsyassar@uic.edu); [guw8@pitt.edu](mailto:guw8@pitt.edu).

## Supplementary Tables and Figures

**Supplementary Table 1.** List of enthalpy of formation and lattice constant for the binary and quaternary alloys predicted by MEAM and DFT calculations.

| Alloy              | phase           | Lattice Constant (Å) |       | Enthalpy of Formation (eV atom <sup>-1</sup> ) |        |
|--------------------|-----------------|----------------------|-------|------------------------------------------------|--------|
|                    |                 | DFT                  | MEAM  | DFT                                            | MEAM   |
| Co <sub>3</sub> Mo | L1 <sub>2</sub> | 3.590                | 3.658 | 0.009                                          | 0.009  |
| CoMo               | B2              | 2.997                | 2.997 | 0.297                                          | 0.297  |
| CoMo <sub>3</sub>  | L1 <sub>2</sub> | 3.860                | 3.859 | 0.210                                          | 0.215  |
| Co <sub>3</sub> Fe | L1 <sub>2</sub> | 3.546                | 3.490 | 0.012                                          | 0.033  |
| CoFe               | B2              | 2.845                | 2.843 | -0.056                                         | -0.054 |
| CoFe <sub>3</sub>  | L1 <sub>2</sub> | 3.484                | 3.491 | 0.140                                          | 0.091  |
| Co <sub>3</sub> Ni | L1 <sub>2</sub> | 3.522                | 3.542 | 0.003                                          | 0.005  |
| CoNi               | B2              | 2.811                | 2.878 | 0.156                                          | 0.134  |
| CoNi <sub>3</sub>  | L1 <sub>2</sub> | 3.525                | 3.526 | 0.013                                          | 0.014  |
| Co <sub>3</sub> Cu | L1 <sub>2</sub> | 3.555                | 3.496 | 0.130                                          | 0.131  |
| CoCu               | B2              | 2.843                | 2.843 | 0.268                                          | 0.267  |
| CoCu <sub>3</sub>  | L1 <sub>2</sub> | 3.612                | 3.471 | 0.181                                          | 0.183  |
| Mo <sub>3</sub> Fe | L1 <sub>2</sub> | 3.888                | 3.801 | 0.284                                          | 0.289  |
| MoFe               | B2              | 3.004                | 3.004 | 0.182                                          | 0.182  |
| MoFe <sub>3</sub>  | L1 <sub>2</sub> | 3.606                | 3.617 | 0.095                                          | 0.087  |
| Mo <sub>3</sub> Ni | L1 <sub>2</sub> | 3.864                | 3.884 | 0.111                                          | 0.106  |
| MoNi               | B2              | 2.991                | 2.993 | 0.298                                          | 0.305  |
| MoNi <sub>3</sub>  | L1 <sub>2</sub> | 3.645                | 3.614 | 0.096                                          | 0.097  |
| Mo <sub>3</sub> Cu | L1 <sub>2</sub> | 3.887                | 3.902 | 0.209                                          | 0.207  |
| MoCu               | B2              | 3.029                | 3.029 | 0.522                                          | 0.522  |
| MoCu <sub>3</sub>  | L1 <sub>2</sub> | 3.766                | 3.580 | 0.498                                          | 0.492  |
| Fe <sub>3</sub> Ni | L1 <sub>2</sub> | 3.599                | 3.541 | 0.043                                          | 0.044  |
| FeNi               | B2              | 2.855                | 2.846 | 0.076                                          | 0.073  |
| FeNi <sub>3</sub>  | L1 <sub>2</sub> | 3.548                | 3.506 | -0.089                                         | -0.089 |
| Fe <sub>3</sub> Cu | L1 <sub>2</sub> | 3.617                | 3.574 | 0.129                                          | 0.128  |
| FeCu               | B2              | 2.895                | 2.895 | 0.268                                          | 0.268  |
| FeCu <sub>3</sub>  | L1 <sub>2</sub> | 3.653                | 3.486 | 0.219                                          | 0.220  |
| Ni <sub>3</sub> Cu | L1 <sub>2</sub> | 3.549                | 3.485 | 0.032                                          | 0.032  |
| NiCu               | B2              | 2.841                | 2.842 | 0.081                                          | 0.081  |
| NiCu <sub>3</sub>  | L1 <sub>2</sub> | 3.603                | 3.489 | 0.012                                          | 0.012  |
| CoMoFeNi           | fcc             | 3.608                | 3.582 | 0.038                                          | 0.029  |
| CoMoFeCu           | fcc             | 3.642                | 3.604 | 0.238                                          | 0.146  |
| CoFeNiCu           | fcc             | 3.580                | 3.513 | 0.058                                          | 0.076  |
| CoMoNiCu           | fcc             | 3.655                | 3.584 | 0.257                                          | 0.175  |
| MoFeNiCu           | fcc             | 3.649                | 3.599 | 0.237                                          | 0.135  |

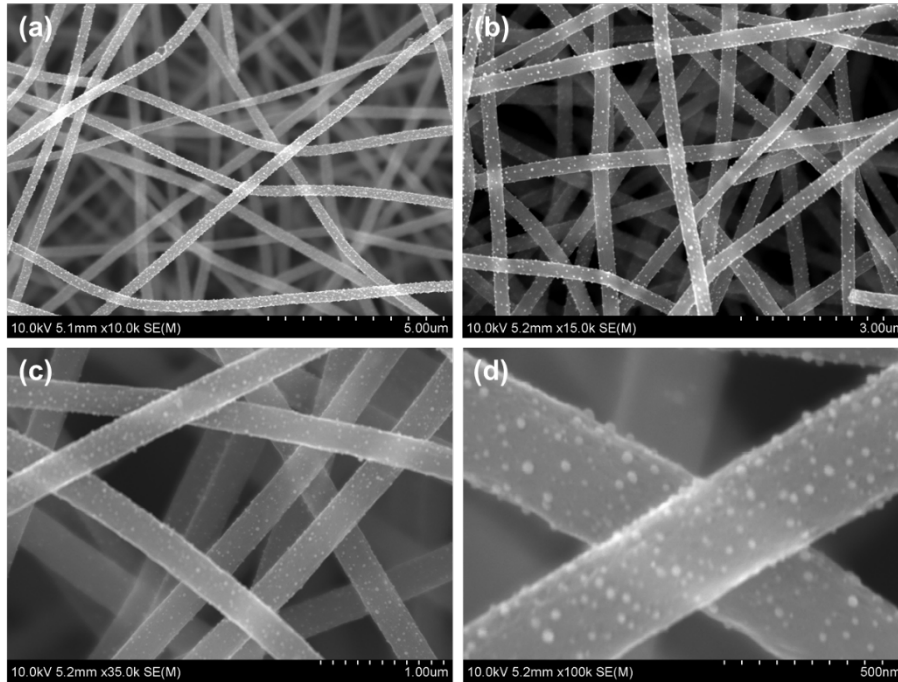

**Supplementary Figure 1. SEM images of  $\text{Co}_{25}\text{Mo}_{45}\text{Fe}_{10}\text{Co}_{10}\text{Ni}_{10}$  supported on carbon nanofibers, verifying the dispersion of nanoparticles.**

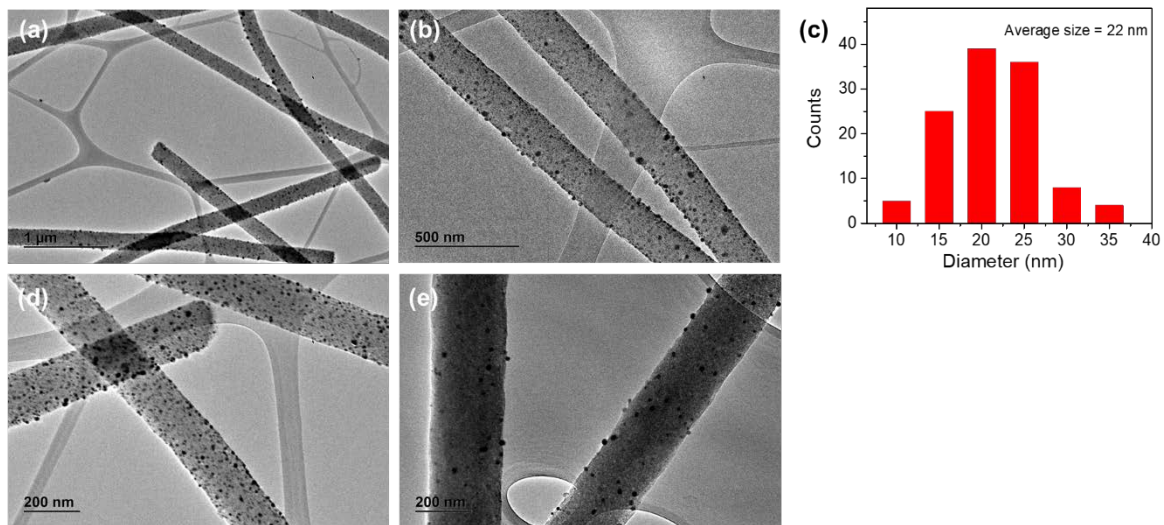

**Supplementary Figure 2. TEM images of the  $\text{Co}_{25}\text{Mo}_{45}\text{Fe}_{10}\text{Co}_{10}\text{Ni}_{10}$  nanoparticles supported on CNFs.**

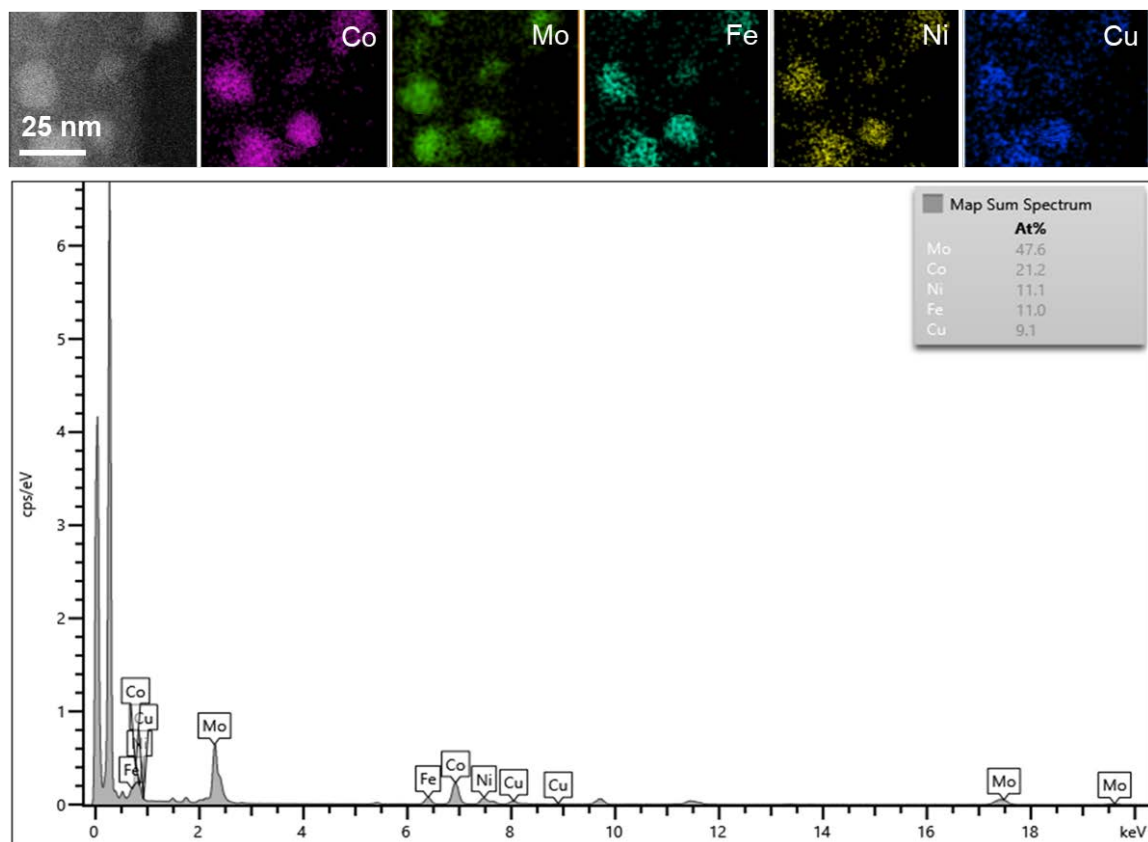

**Supplementary Figure 3. STEM elemental maps (a) and corresponding spectrum at a low magnification for  $\text{Co}_{25}\text{Mo}_{45}\text{Fe}_{10}\text{Co}_{10}\text{Ni}_{10}$  supported on CNF.**

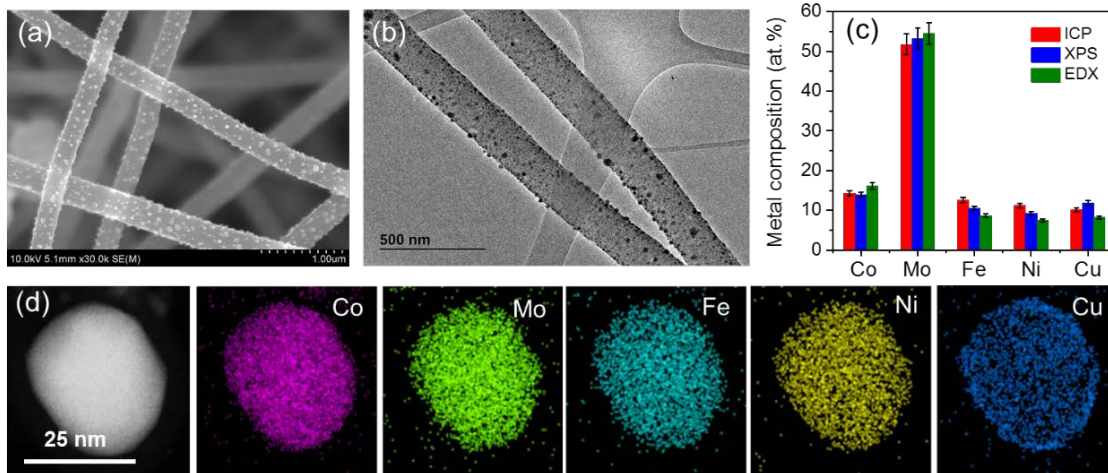

**Supplementary Figure 4. SEM (a) and TEM (b) images** of  $\text{Co}_{15}\text{Mo}_{55}\text{Fe}_{10}\text{Co}_{10}\text{Ni}_{10}$  nanoparticles well dispersed on CNFs. (c) Comparison of the composition analyses for  $\text{Co}_{15}\text{Mo}_{55}\text{Fe}_{10}\text{Co}_{10}\text{Ni}_{10}$  using three different techniques (ICP-MS, XPS, and EDX), verifying the homogeneous alloy nature. Error bars denote SDs. (d) STEM elemental maps of  $\text{Co}_{15}\text{Mo}_{55}\text{Fe}_{10}\text{Co}_{10}\text{Ni}_{10}$  nanoparticles.

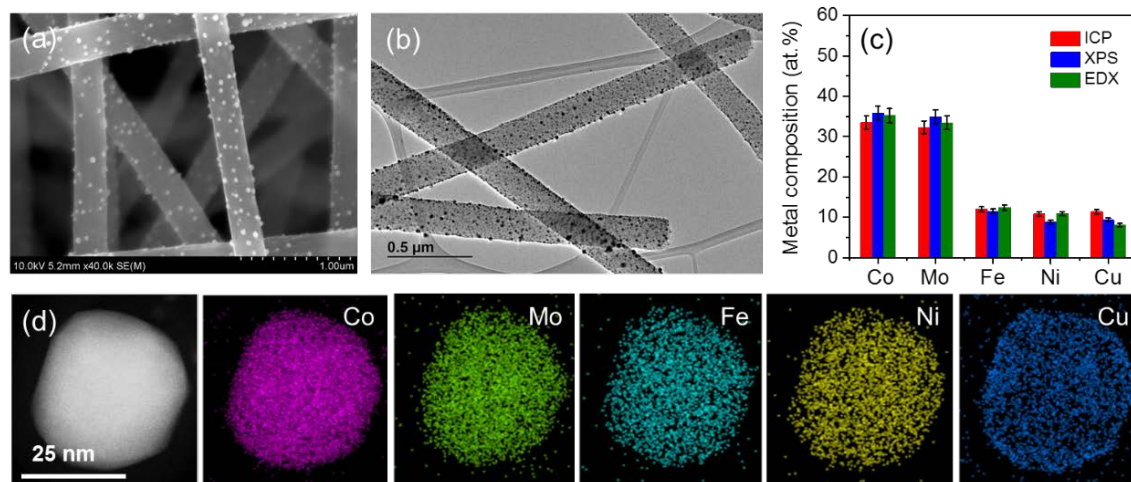

**Supplementary Figure 5. SEM (a) and TEM (b) images** of  $\text{Co}_{35}\text{Mo}_{35}\text{Fe}_{10}\text{Co}_{10}\text{Ni}_{10}$  nanoparticles well dispersed on CNFs. (c) Comparison of the composition analyses for  $\text{Co}_{35}\text{Mo}_{35}\text{Fe}_{10}\text{Co}_{10}\text{Ni}_{10}$  using three different techniques (ICP-MS, XPS, and EDX), verifying the homogeneous alloy nature. Error bars denote SDs. (d) STEM elemental maps of  $\text{Co}_{35}\text{Mo}_{35}\text{Fe}_{10}\text{Co}_{10}\text{Ni}_{10}$  nanoparticles.

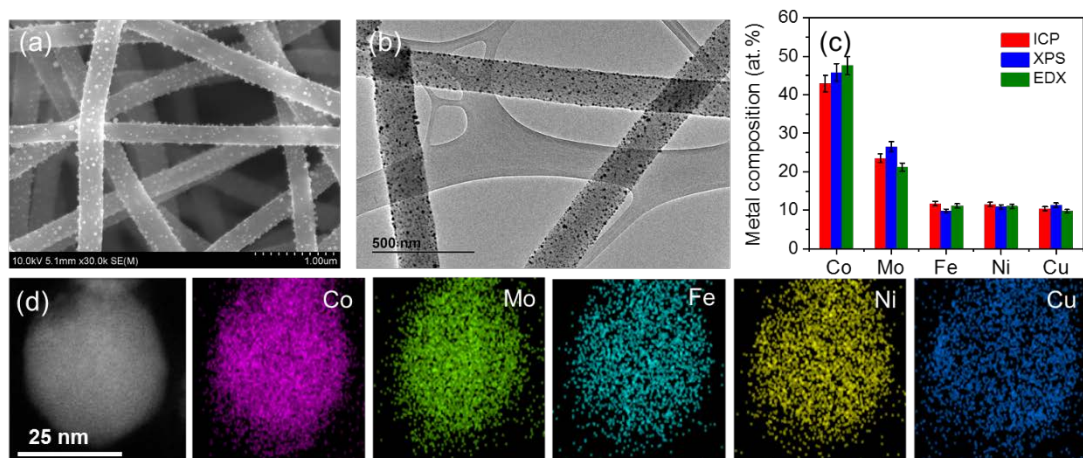

**Supplementary Figure 6. SEM (a) and TEM (b) images** of  $\text{Co}_{45}\text{Mo}_{25}\text{Fe}_{10}\text{Co}_{10}\text{Ni}_{10}$  nanoparticles well dispersed on CNFs. (c) Comparison of the composition analyses for  $\text{Co}_{45}\text{Mo}_{25}\text{Fe}_{10}\text{Co}_{10}\text{Ni}_{10}$  using three different techniques (ICP-MS, XPS, and EDX), verifying the homogeneous alloy nature. Error bars denote SDs. (d) STEM elemental maps of  $\text{Co}_{45}\text{Mo}_{25}\text{Fe}_{10}\text{Co}_{10}\text{Ni}_{10}$  nanoparticles.



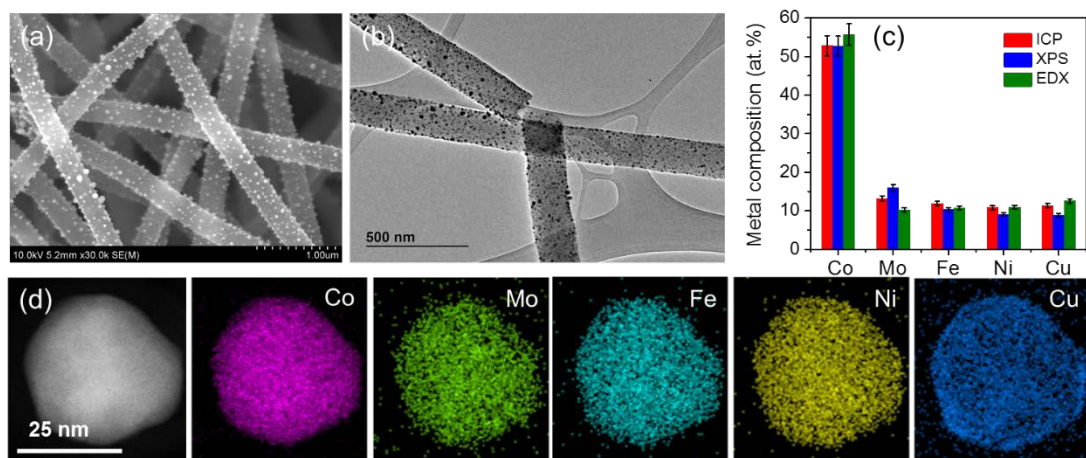

**Supplementary Figure 7. SEM (a) and TEM (b) images** of  $\text{Co}_{55}\text{Mo}_{15}\text{Fe}_{10}\text{Co}_{10}\text{Ni}_{10}$  nanoparticles well dispersed on CNFs. (c) Comparison of the composition analyses for  $\text{Co}_{55}\text{Mo}_{15}\text{Fe}_{10}\text{Co}_{10}\text{Ni}_{10}$  using three different techniques (ICP-MS, XPS, and EDX), verifying the homogeneous alloy nature. Error bars denote SDs. (d) STEM elemental maps of  $\text{Co}_{55}\text{Mo}_{15}\text{Fe}_{10}\text{Co}_{10}\text{Ni}_{10}$  nanoparticles.

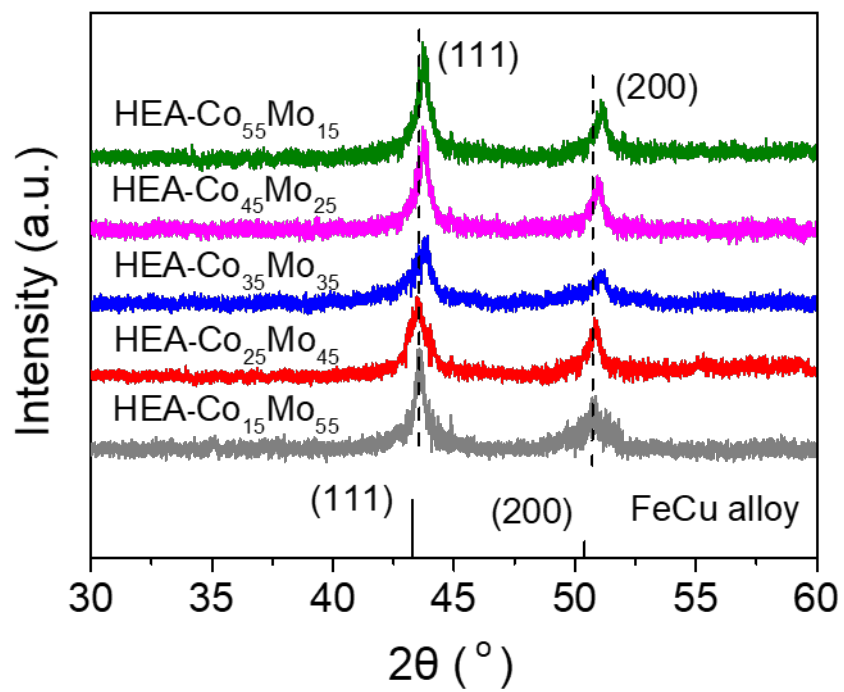

**Supplementary Figure 8.** Comparison of the XRD patterns of HEA-Co<sub>x</sub>Mo<sub>y</sub> catalysts and with the standard patterns of FeCu (JCDPS no. 65-7002).

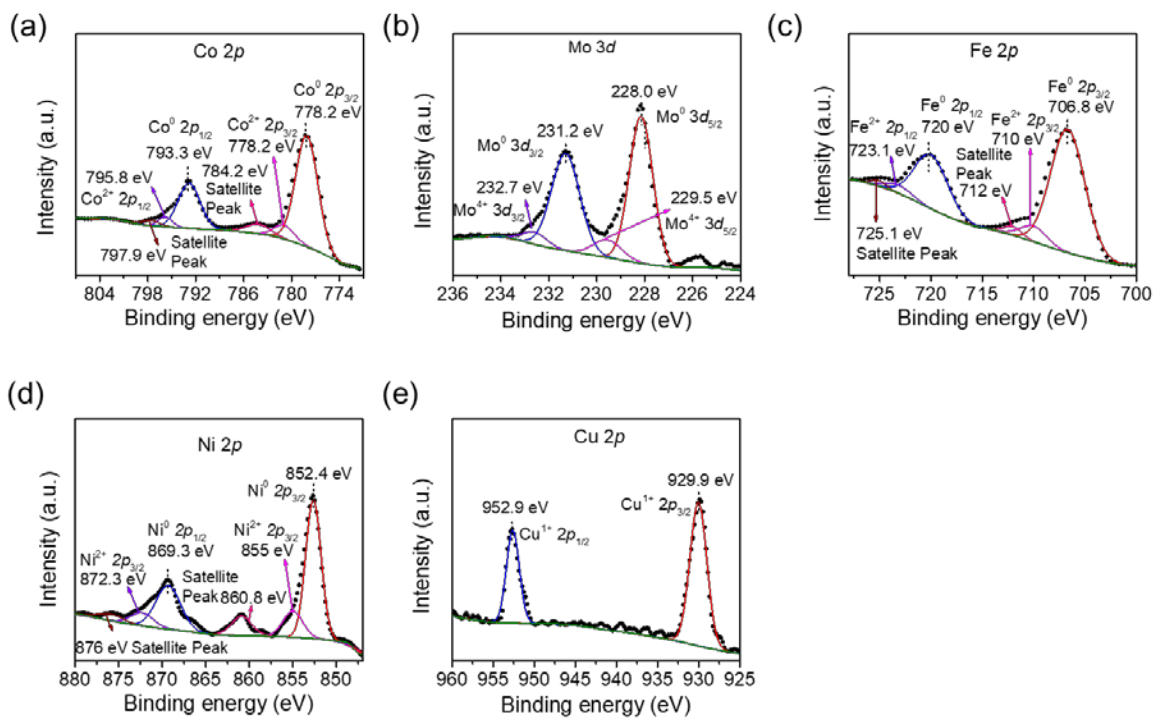

**Supplementary Figure 9.** (a-e) XPS spectra at the Co 3d, Mo 2p, Fe 2p, Ni 2p and Cu 2p edges collected on  $\text{Co}_{25}\text{Mo}_{45}\text{Fe}_{10}\text{Co}_{10}\text{Ni}_{10}$  nanoparticles after the  $\text{NH}_3$  decomposition reaction.

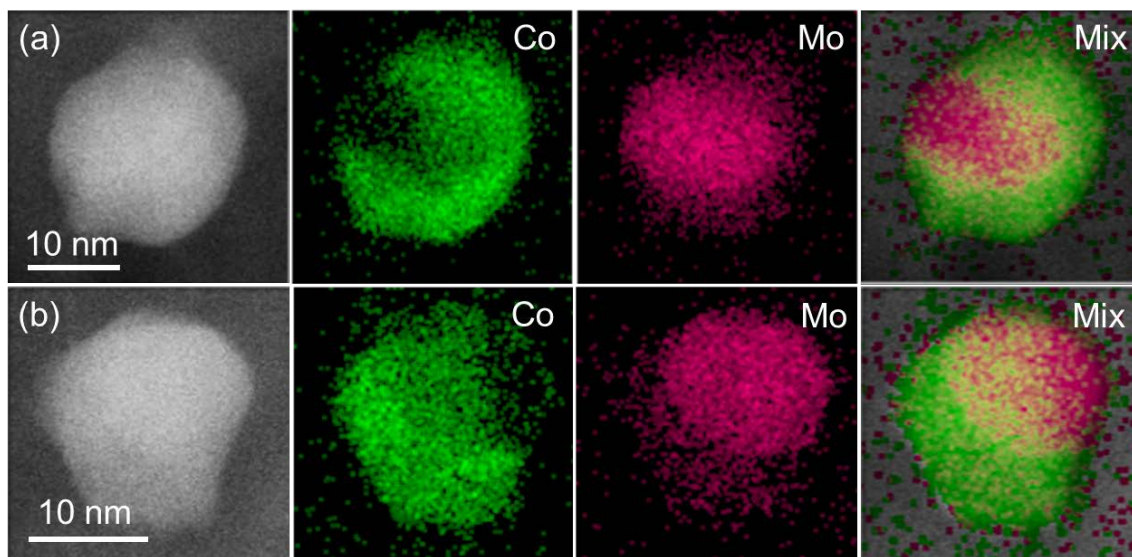

**Supplementary Figure 10. STEM elemental maps of bimetallic CoMo alloy nanoparticles ( $\text{Co/Mo} = 25/45$ ), which showing segregated phases and demonstrating immiscibility with the current Co/Mo ratio.**

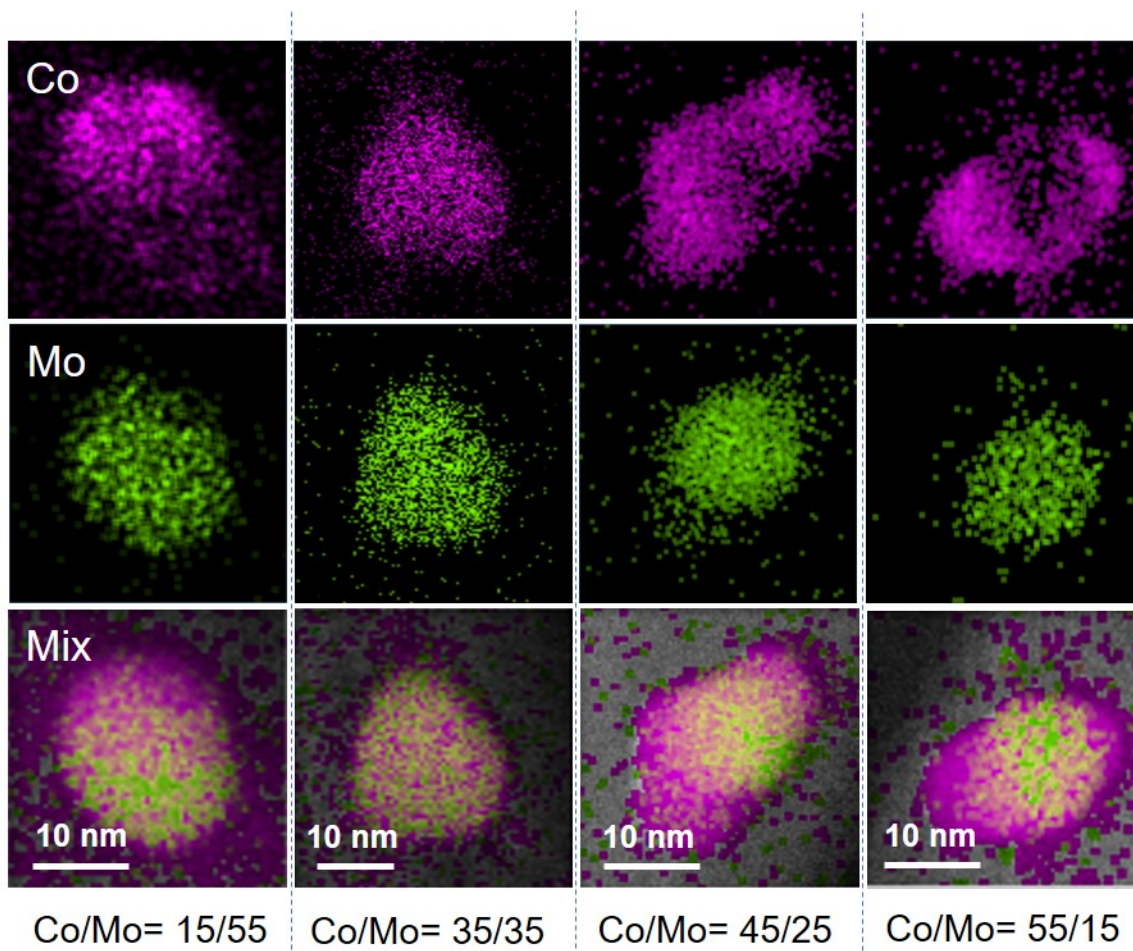

**Supplementary Figure 11. STEM elemental maps of Bimetallic CoMo alloy nanoparticles (Co/Mo = 15/55, 35/35, 45/25 and 55/15), demonstrating that bimetallic CoMo alloy is immiscible except the Co/Mo close to 1 (i.e., bimetallic CoMo, Co/Mo = 35/35).**

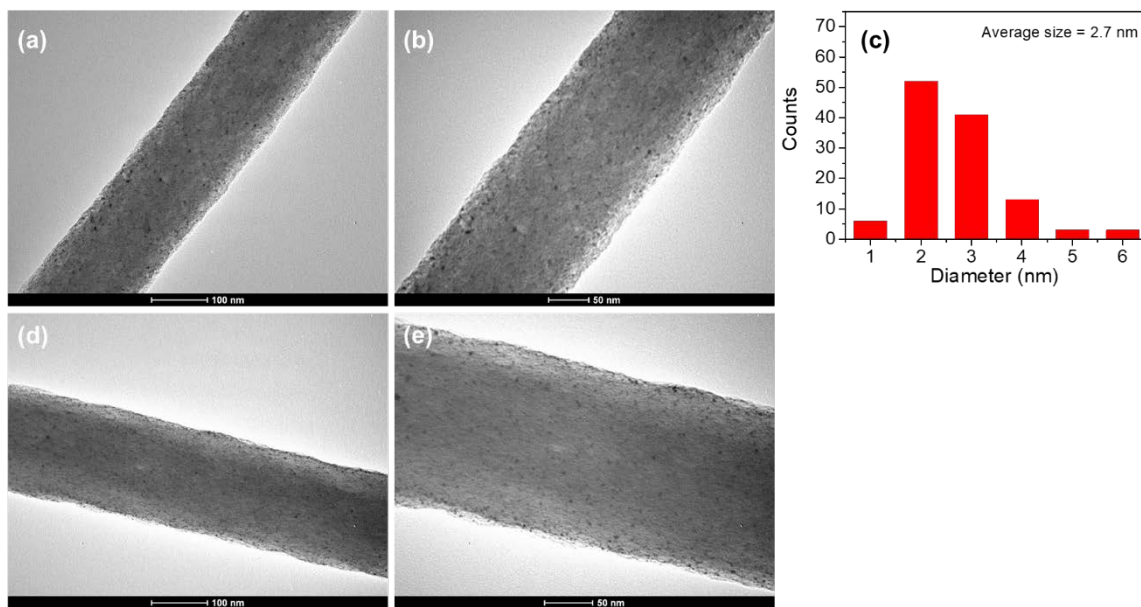

**Supplementary Figure 12.** TEM images of Ru supported on carbon nanofibers (CNF), showing the average size of nanoparticles is 2.7 nm.



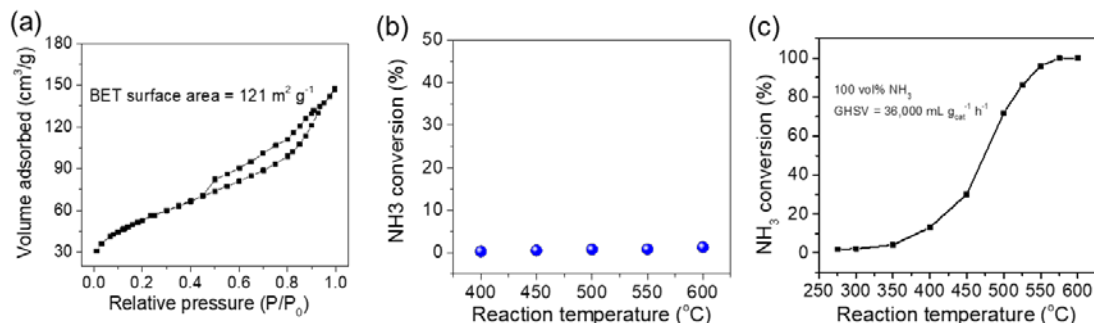

**Supplementary Figure 13. Characterization and catalytic performance of bare carbon nanofibers.** (a)  $N_2$  adsorption and desorption isotherms and (b)  $NH_3$  decomposition measured on the bare CNF substrates. Reaction condition in (b): 5 vol%  $NH_3$ , space velocity =  $36 \text{ L g}_{\text{cata}}^{-1} \text{ h}^{-1}$ . (c)  $NH_3$  decomposition measured on the Ru/CNF substrates with 100 vol%  $NH_3$ , space velocity =  $36 \text{ L g}_{\text{cata}}^{-1} \text{ h}^{-1}$ .

**Supplementary Table 2.** Comparison of our Ru/CNFs benchmark with the Ru catalysts reported in the literature for decomposition of 100 vol%  $NH_3$ .

| Catalysts             | T<br>°C | GHSV<br>$\text{mL g}_{\text{cat}}^{-1} \text{ h}^{-1}$ | $NH_3$ Conversion<br>% | Ref       |
|-----------------------|---------|--------------------------------------------------------|------------------------|-----------|
| Ru/CNTs               | 500     | 30,000                                                 | 84                     | 1         |
| Ru/Graphene           | 500     | 20,000                                                 | 82                     | 2         |
| Ru/amorphous carbon   | 550     | 30,000                                                 | 14                     | 3         |
| Ru/ $TiO_2$           | 500     | 30,000                                                 | 64                     | 4         |
| Ru/ $Al_2O_3$         | 500     | 30,000                                                 | 58                     | 5         |
| Ru/CNFs               | 500     | 36,000                                                 | 72                     | This work |
| HEA- $Co_{55}Mo_{15}$ | 500     | 36,000                                                 | 100                    | This work |

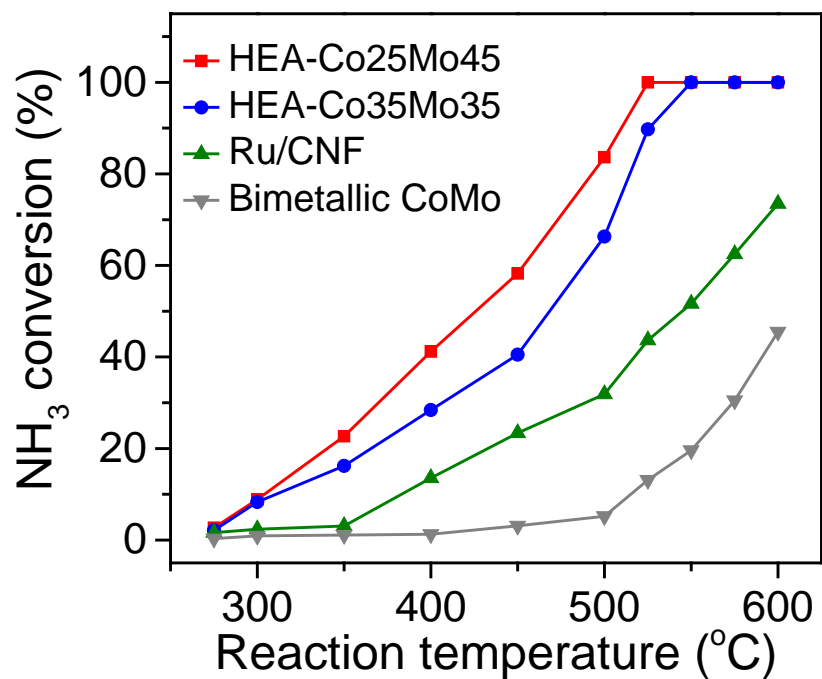

**Supplementary Figure 14.**  $\text{NH}_3$  conversions depended on reaction temperatures over HEA- $\text{Co}_x\text{Mo}_y$  nanoparticles, Ru/CNF, and bimetallic CoMo (Co/Mo = 25/45) Reaction condition: 5 vol%  $\text{NH}_3$ , Space velocity =  $36 \text{ L g}_{\text{cata}}^{-1} \text{ h}^{-1}$ .



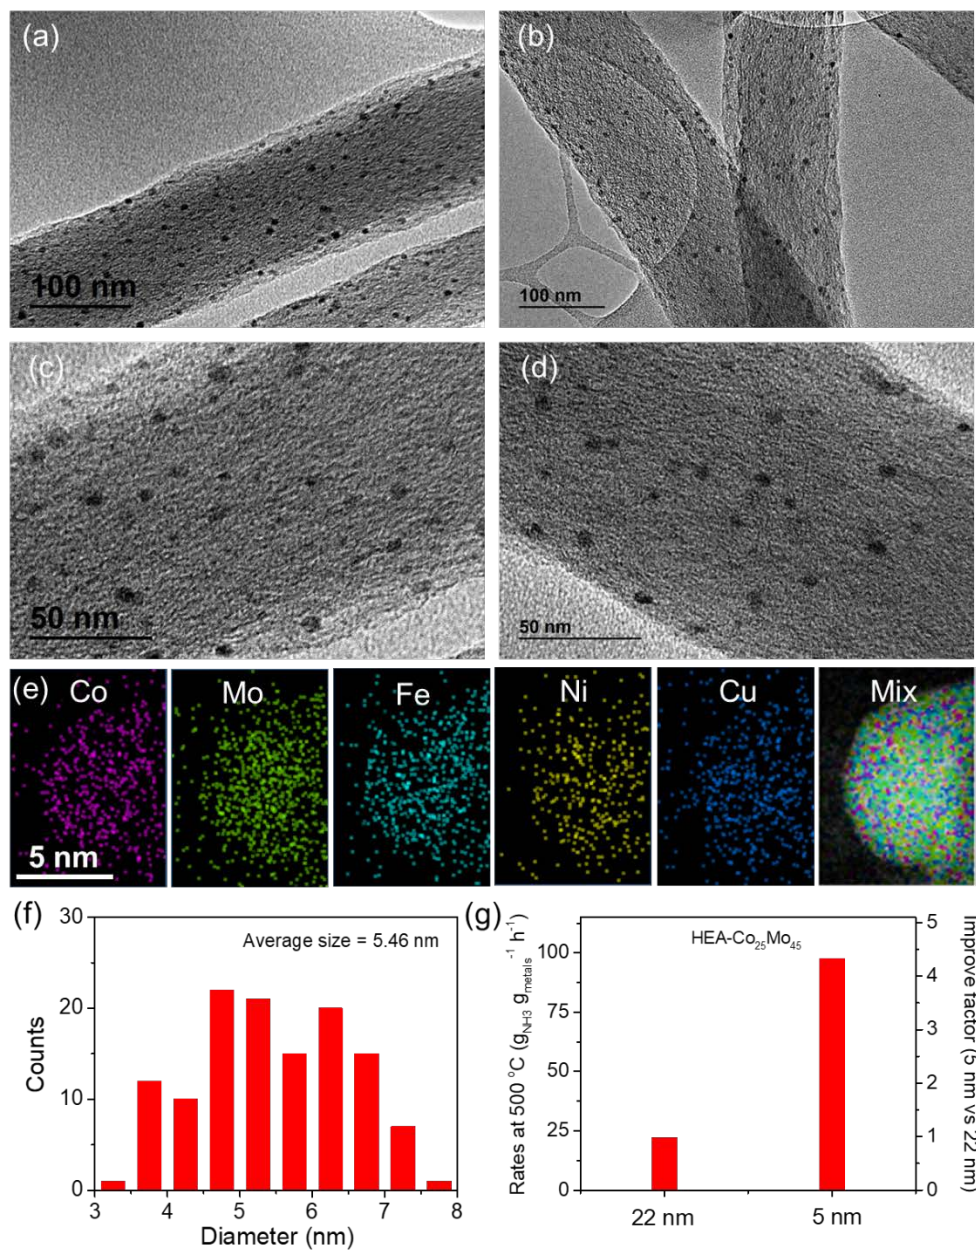

**Supplementary Figure 15.** (a-d) TEM images of  $\text{Co}_{25}\text{Mo}_{45}\text{Fe}_{10}\text{Co}_{10}\text{Ni}_{10}\text{-S}$  (denoted as HEA- $\text{Co}_{25}\text{Mo}_{45}\text{-S}$ ) supported on CNFs. (e) STEM-based elemental maps of the HEA- $\text{Co}_{25}\text{Mo}_{45}\text{-S}$  nanoparticles (f) Particle distribution of HEA- $\text{Co}_{25}\text{Mo}_{45}\text{-S}$  nanoparticles showing the nanoparticle sizes are in the range of 3-8 nm and the average size of ~5 nm. (g) Comparison of reaction rates measured in the kinetic regime among HEA- $\text{Co}_{25}\text{Mo}_{45}\text{-S}$  and HEA- $\text{Co}_{25}\text{Mo}_{45}$  ( $T = 500\text{ }^{\circ}\text{C}$ ).

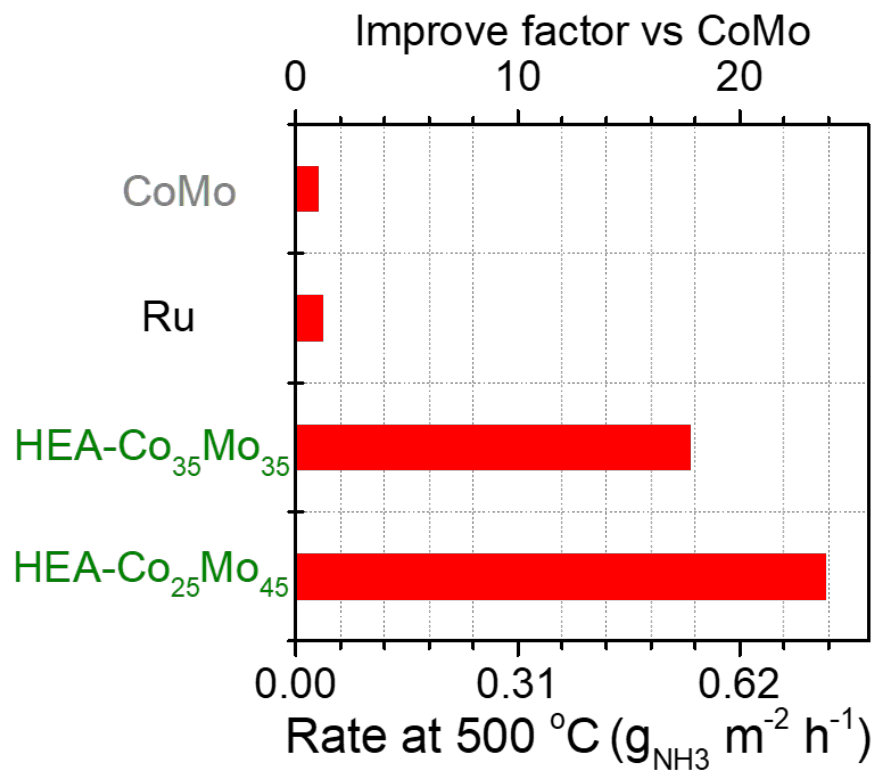

**Supplementary Figure 16.** Comparison of reaction rates normalized by specific surface areas (estimated from the average particle sizes) between bimetallic Co-Mo, Ru, and Co<sub>x</sub>Mo<sub>y</sub>-HEA catalysts (T = 500 °C, 5 vol% NH<sub>3</sub>, GHSV = 36 L<sub>NH3</sub> g<sub>cata</sub><sup>-1</sup> h<sup>-1</sup>).

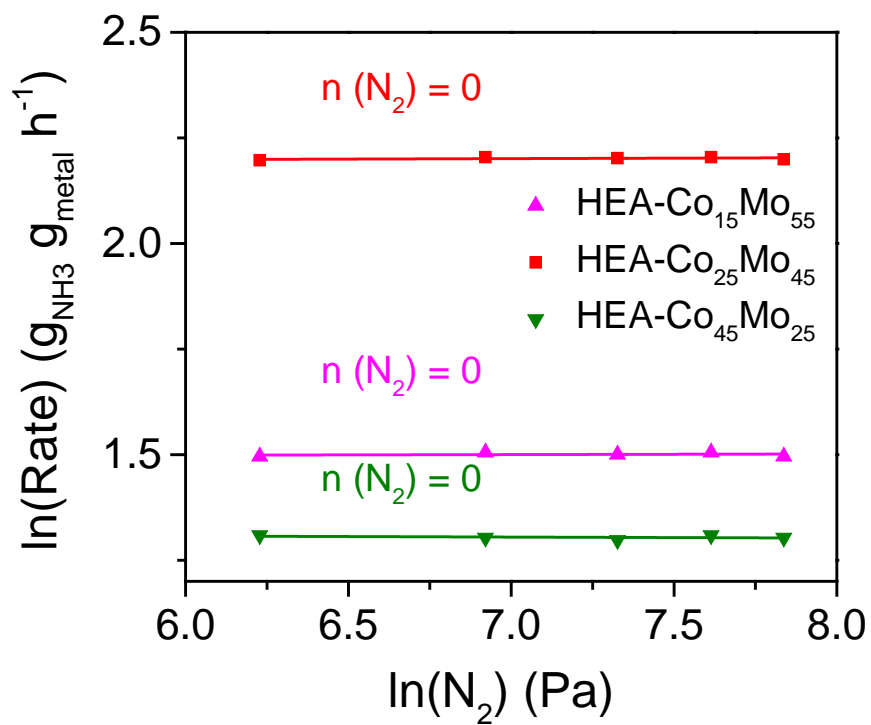

**Supplementary Figure 17.** The Reaction orders of  $N_2$  during  $NH_3$  decomposition over HEA-Co<sub>x</sub>Mo<sub>y</sub> catalysts.

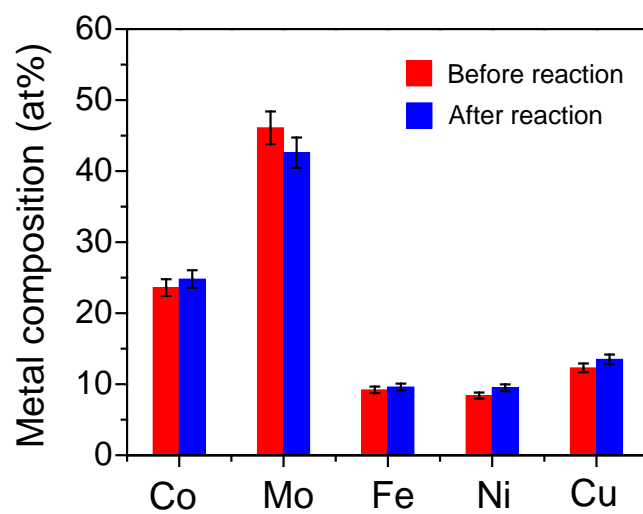

**Supplementary Figure 18.** Composition analysis by XPS of  $\text{Co}_{25}\text{Mo}_{45}\text{Fe}_{10}\text{Co}_{10}\text{Ni}_{10}$  nanoparticles before and after  $\text{NH}_3$  decomposition. Error bars denote SDs.

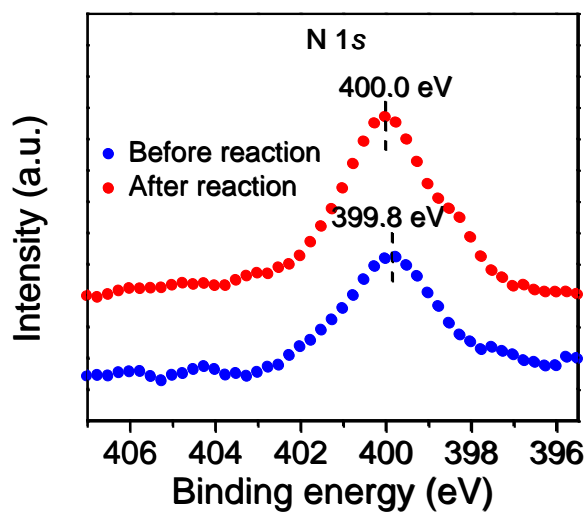

**Supplementary Figure 19.** Comparison of the weak N 1s XPS peak of HEA-Co<sub>25</sub>Mo<sub>45</sub> before and after the reaction.

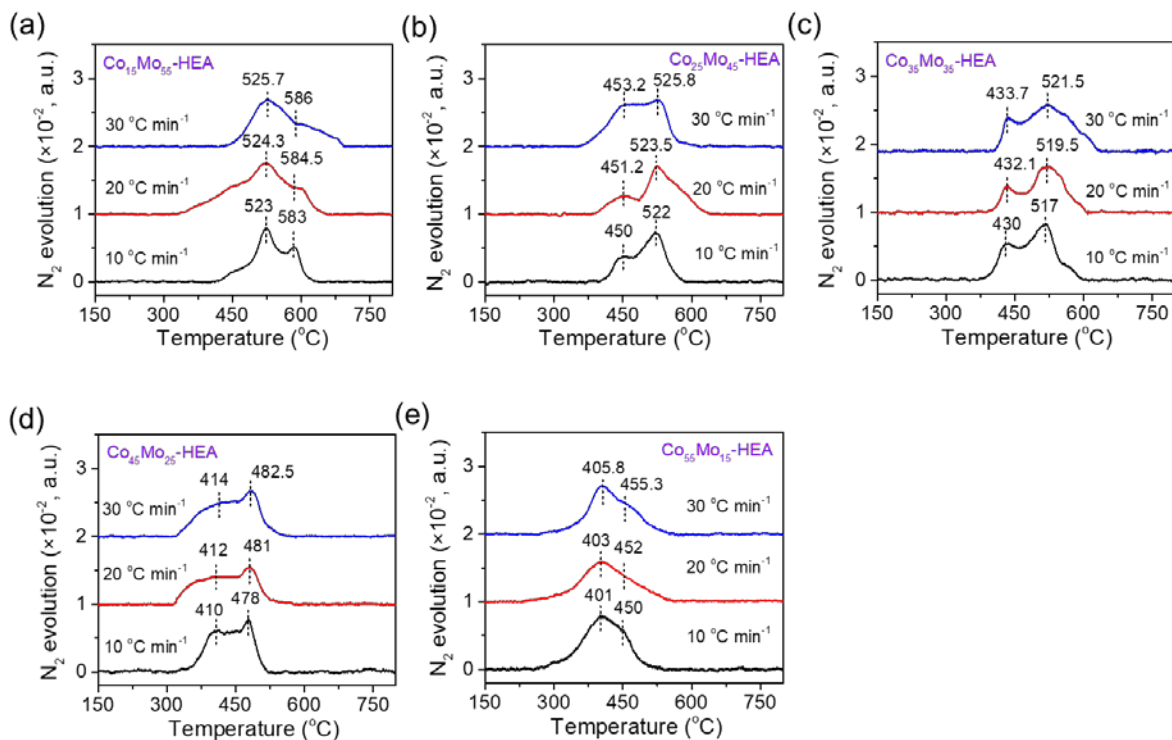

**Supplementary Figure 20.** Nitrogen TPD profiles recorded at different ramping rates on (a) HEA-Co<sub>15</sub>Mo<sub>55</sub>, (b) HEA-Co<sub>25</sub>Mo<sub>45</sub>, (c) HEA-Co<sub>35</sub>Mo<sub>35</sub>, (d) HEA-Co<sub>45</sub>Mo<sub>25</sub> and (e) HEA-Co<sub>55</sub>Mo<sub>15</sub> catalysts.

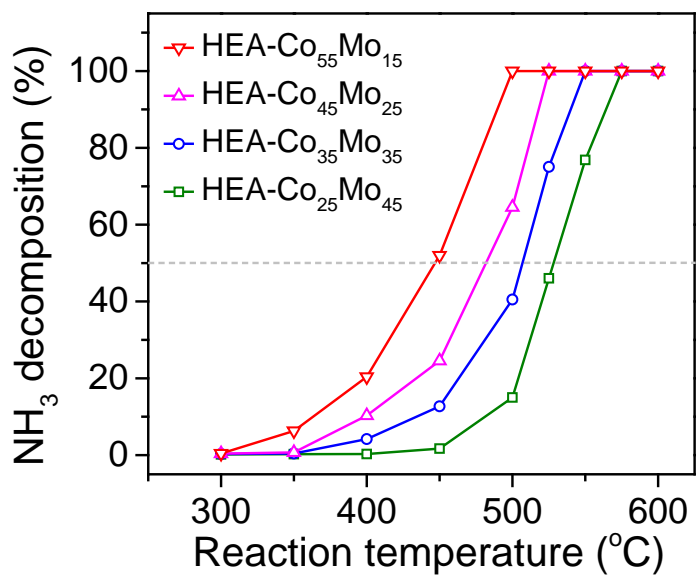

**Supplementary Figure 21.** Catalytic performance of NH<sub>3</sub> decomposition over HEA-Co<sub>x</sub>Mo<sub>y</sub> nanoparticles supported CNF. Reaction condition: 100 vol% NH<sub>3</sub>, Space velocity = 36 L g<sub>cata</sub><sup>-1</sup> h<sup>-1</sup>.

## Supplementary Reference

- 1 Yin, S. F., Xu, B. Q., Zhou, X. P. & Au, C. T. A mini-review on ammonia decomposition catalysts for on-site generation of hydrogen for fuel cell applications. *Appl Catal a-Gen* **277**, 1-9 (2004).
- 2 Li, G., Kanezashi, M. & Tsuru, T. Catalytic ammonia decomposition over high-performance Ru/Graphene nanocomposites for efficient CO<sub>x</sub>-free hydrogen production. *Catalysts* **7** (2017).
- 3 Li, L., Zhu, Z. H., Yan, Z. F., Lu, G. Q. & Rintoul, L. Catalytic ammonia decomposition over Ru/carbon catalysts: The importance of the structure of carbon support. *Appl Catal a-Gen* **320**, 166-172 (2007).
- 4 Yin, S. F., Xu, B. Q., Zhu, W.X., Ng, C.F., Zhou, X. P. & Au, C. T. Carbon nanotubes-supported Ru catalyst for the generation of CO<sub>x</sub>-free hydrogen from ammonia. *Catal Today* **93-5**, 27-38 (2004).
- 5 Karim, A. M., Prasad, V., Mpourmpakis, G., Lonergan, W.W, Frenkel, A.I., Chen J.G., & Vlachos D.G. Correlating particle size and shape of supported Ru/gamma-Al<sub>2</sub>O<sub>3</sub> catalysts with NH<sub>3</sub> decomposition activity. *J Am Chem Soc* **131**, 12230-12239 (2009).
